# Supplementary material for: Benzo[a]pyrene Reduces Testosterone Production in Rat Leydig Cells via a Direct Disturbance of Testicular Steroidogenic Machinery
Source: PubMed Central journal article supplement (PMC3226498; doi:10.1289/ehp.1003391), 2011-07-07
Supplement: ehp.1003391.s001.pdf [file ehp.1003391.s001.pdf]

**Benzo[a]pyrene Reduces Testosterone Production in Rat Leydig Cells via a Direct  
Disturbance of Testicular Steroidogenic Machinery**

Jin-Yong Chung, Yoon-Jae Kim, Ji Young Kim, Seung Gee Lee, Ji-Eun Park, Won Rok Kim,  
Yong-Dal Yoon, Ki Soo Yoo, Young Hyun Yoo, and Jong-Min Kim

**Supplemental Material**

## Table of contents

|                                                                                                                                                               |   |
|---------------------------------------------------------------------------------------------------------------------------------------------------------------|---|
| • Supplementary Figure 1. Histological changes in the caput and cauda epididymis following exposure to B[a]P. -----                                           | 1 |
| • Supplementary Figure 2. Acrosomal change (A) and immunolocalization of ADAM3 (B) in sperm. -----                                                            | 2 |
| • Supplementary Figure 3. Immunocytochemical localizations of StAR, P450scc, and 3 $\beta$ -HSD in Leydig cells. -----                                        | 3 |
| • Supplementary Figure 4. Changes of CYP17A1 expression in Leydig cells from testes of rats exposed to B[a]P. -----                                           | 4 |
| • Supplementary Figure 5. Recovery of decreased StAR protein content in Leydig cells exposed to B[a]P <i>in vivo</i> by hCG treatment <i>in vitro</i> . ----- | 5 |
| • Supplementary Table 1. Oligonucleotide sequences used for RT-PCR -----                                                                                      | 6 |

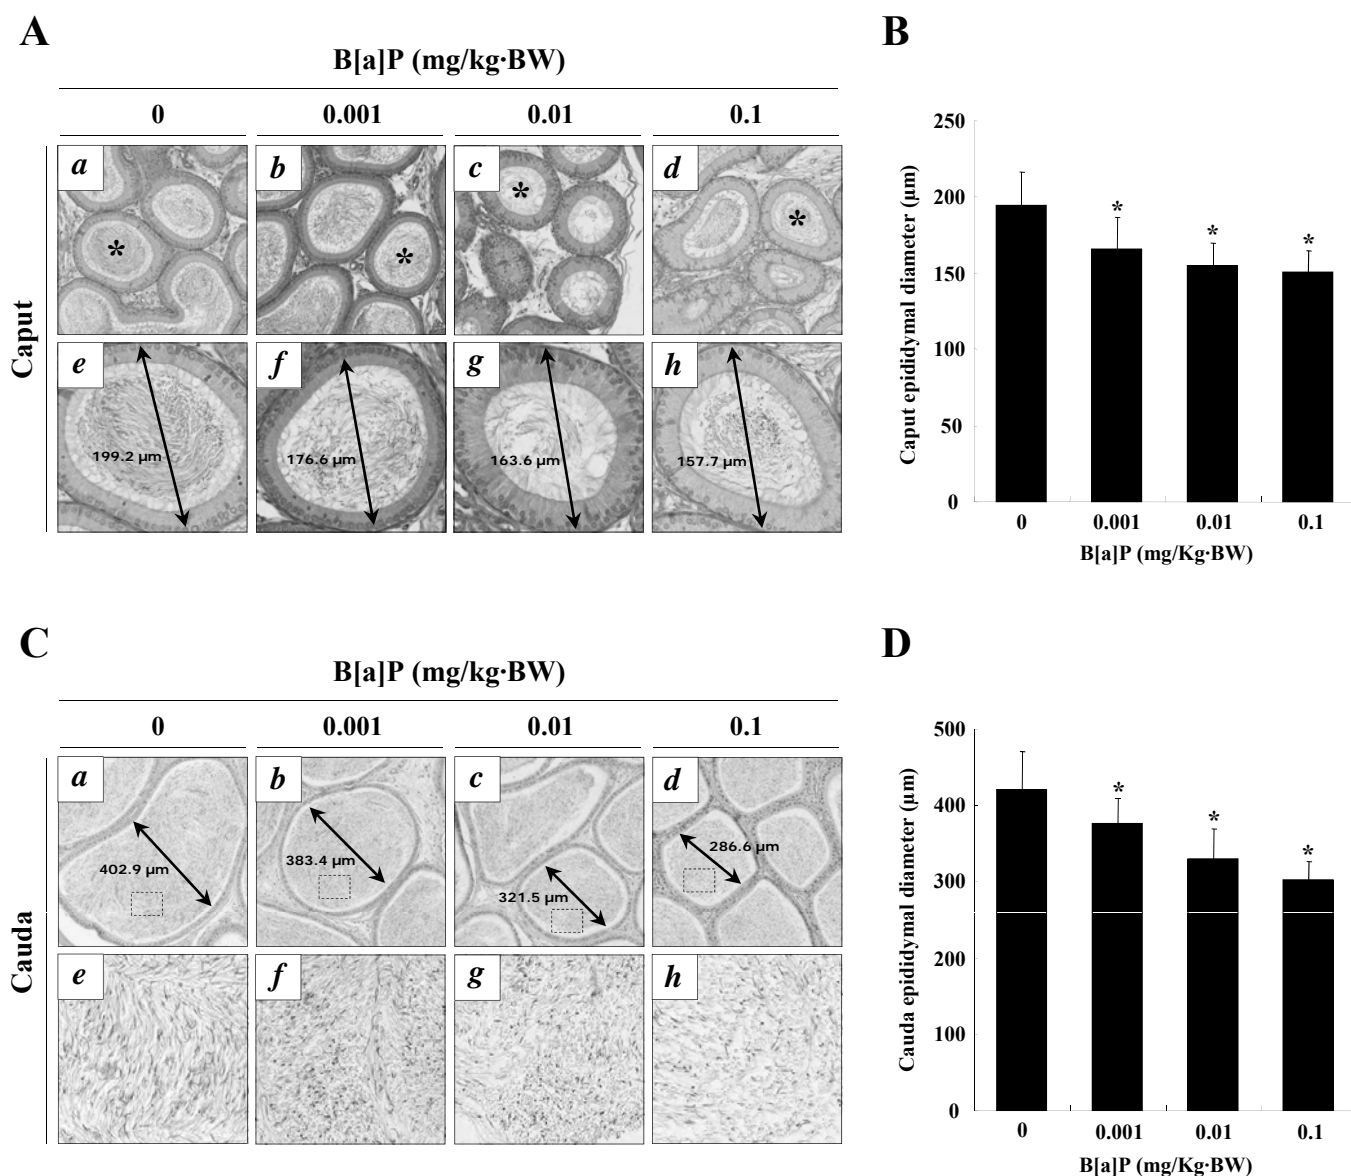

**Supplementary Figure 1. Histological changes in the caput and cauda epididymis following exposure to B[a]P.** Rats received 0, 0.001, 0.01, or 0.1 mg/kg-BW/day of B[a]P for 90 days by gavage. A: PAS staining of caput epididymides. B: Diagram illustrating changes in diameters (indicated by arrows in A-e, A-f, A-g, and A-h) of caput epididymal tubules. C: PAS staining of cauda epididymides. D: Diagram illustrating changes in diameters (indicated by arrows in C-a, C-b, C-c, and C-d) of caput epididymal tubules. A and C: a and e, control (0 mg); b and f, 0.001 mg; c and g, 0.01 mg; and d and h, 0.1 mg. Original magnification (upper panel):  $\times 200$ . Photographs in the lower panel were digitally magnified  $3.6\times$  from the asterisk or dot-lined box in the upper panel. B and D: 175 tubules of each group (from 5 samples) were chosen for measurement of diameter. \*,  $P < 0.05$  compared with control.

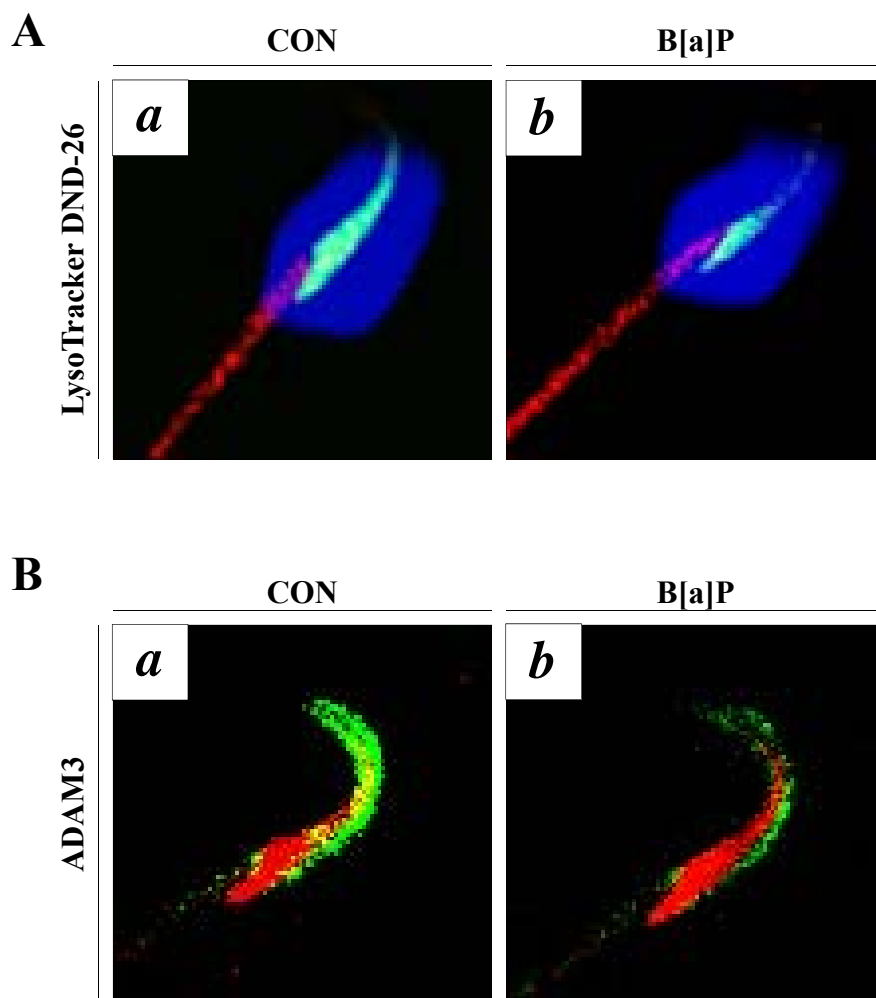

**Supplementary Figure 2. Acrosomal change (A) and immunolocalization of ADAM3 (B) in sperm.** A: Live sperm were stained with LysoTracker DND-26 (green) for sperm acrosomal integrity analysis. Sperm nuclei and mitochondria were counterstained with Hoechst 33258 (blue) and MitoTracker (red), respectively. Original magnification:  $\times 1,600$ . B: Sperm were attached to a glass slide by cytospin centrifugation for immunocytochemistry. The attached sperm samples were fixed with methanol and immunostained with anti-ADAM3 (green) antibody. Sperm nuclei were counterstained with propidium iodide (red). Original magnification:  $\times 1,600$ . The stained sperm observed using a confocal microscope.

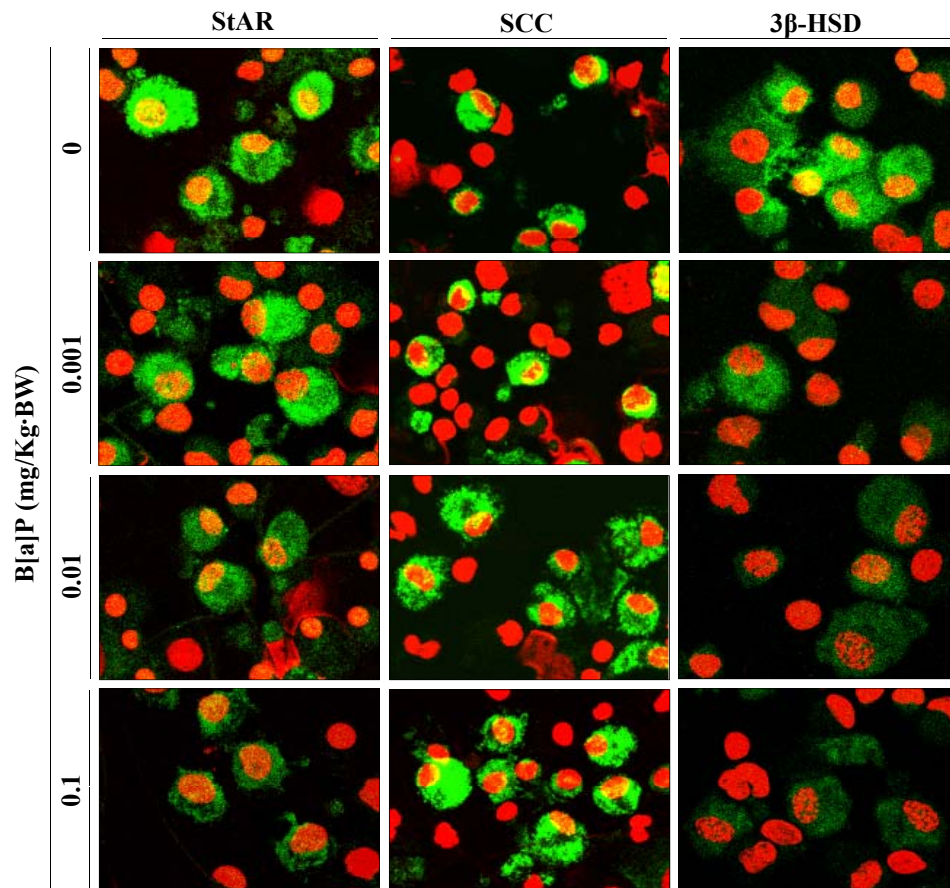

**Supplementary Figure 3. Immunocytochemical localizations of StAR, P450<sub>scc</sub>, and 3 $\beta$ -HSD in Leydig cells.** The cells were cytopun, fixed, and immunostained with the corresponding antibody, counter stained with propidium iodide, and observed using a confocal microscope. Original magnification:  $\times 800$ .

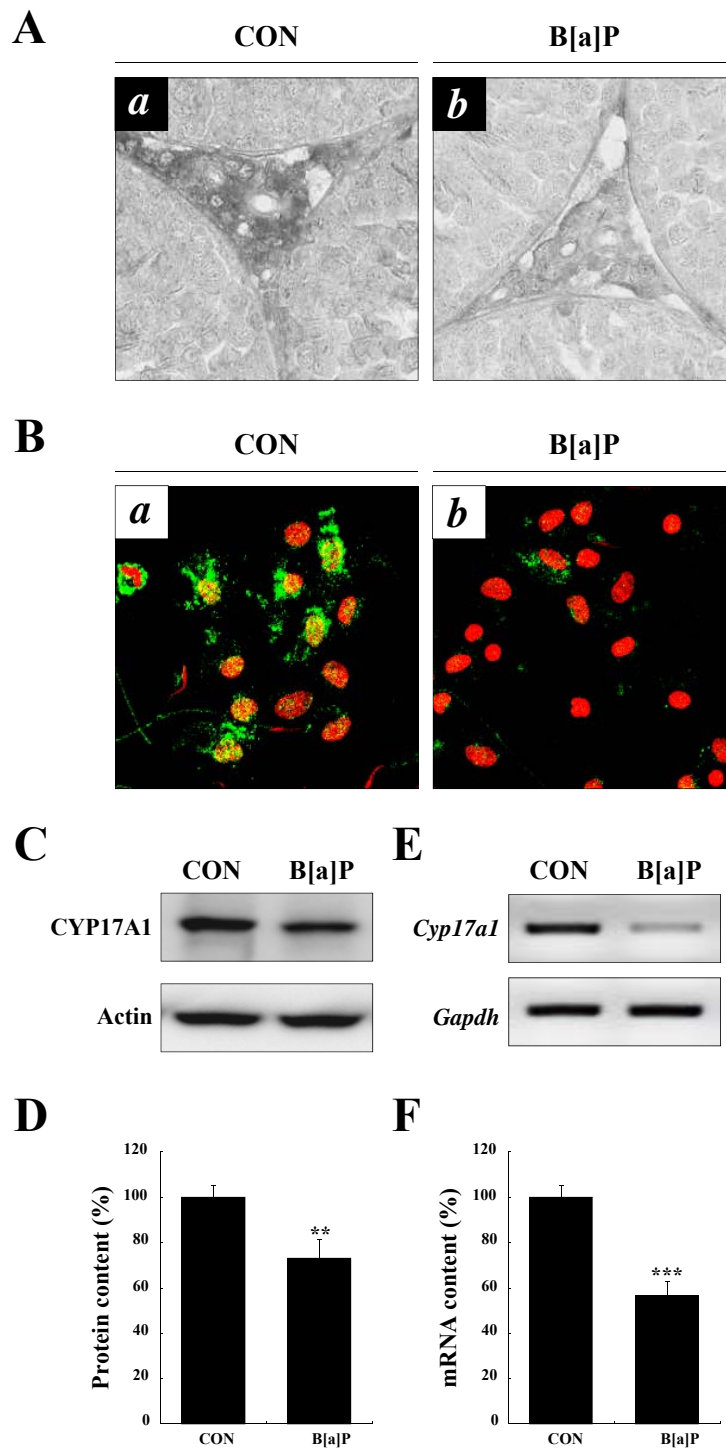

**Supplementary Figure 4. Changes of CYP17A1 expression in Leydig cells from testes of rats exposed to B[a]P.** Rats received 0 or 0.01 mg/Kg BW/day of B[a]P for 90 days by gavage. A: Immunohistochemical localization of CYP17A1 in testicular interstitial compartment of rats. Original magnification:  $\times 400$ . B: Immunocytochemical localization of CYP17A1 in Leydig cells. Original magnification:  $\times 200$ . C: Western blot analysis for CYP17A1. D: Densitometric quantification of CYP17A1 protein content in Leydig cell protein extracts. E: RT-PCR analysis for CYP17A1 gene expression. Gapdh expression was examined as internal control. F: Densitometric quantification of CYP17A1 mRNA content in Leydig cell RNA extracts. In D and F, \*\*,  $P < 0.01$  and \*\*\*,  $P < 0.001$  compared with control.

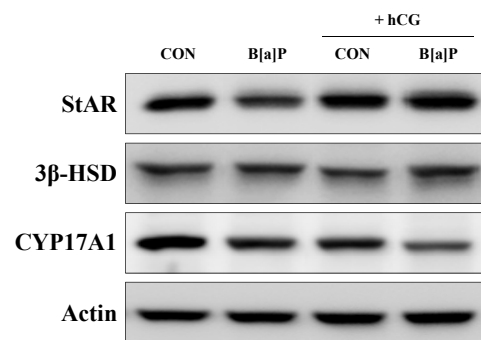

**Supplementary Figure 5. Recovery of decreased StAR protein content in Leydig cells exposed to B[a]P *in vivo* by hCG treatment *in vitro*.** Leydig cells were isolated from testes of rats that had received 0 and 0.01 mg/Kg BW/day of B[a]P for 90 days by gavage, and cultured for 24 h in the absence or presence of hCG (25 IU/ml). Protein extracts from harvested cells were applied to western blot analysis for StAR, 3β-HSD, and CYP17A1.

**Supplementary Table 1. Oligonucleotide sequences used for RT-PCR**

| Gene                 | Primer sequences (5' -> 3')                                              | Accession Number | References         |
|----------------------|--------------------------------------------------------------------------|------------------|--------------------|
| P450scc<br>(CYP11A1) | F: AGA AGC TGG GCA ACA TGG AGT CAG<br>R: TCA CAT CCC AGG CAG CTG CAT GGT | J05156           | Orly et al. 1994   |
| StAR                 | F: CAT CCA GCA AGG AGA GGA AG<br>R: CGT GAG TTT GGT CTT TGA GG           | AY736357         | Kim et al. 2002    |
| 3 $\beta$ -HSD       | F: ACT GGC AAA TTC TCC ATA GCC<br>R: TTC CTC CCA GCT GAC AAG TGG         | M38178           | Orly et al. 1994   |
| CYP17A1              | F: GCC TGA CGG ACA TTC TG<br>R: TCG TGA TGC AGT GCC CAG                  | MM_012753        | Livera et al. 2004 |
